# Supplementary material for: Plant Phylogeny and Life History Shape Rhizosphere Bacterial Microbiome of Summer Annuals in an Agricultural Field
Source: PubMed Central journal article supplement (PMC5732146; doi:10.3389/fmicb.2017.02414), 2017-12-11
Supplement: Table_1.pdf [file Table_1.pdf]

**Table S1** Plant genotypes grown in common garden experiment, sample types collected and GenBank accession numbers for chloroplast sequences of species or congeneric representative used to construct plant phylogeny.

| Maize Line | Species          | Common Name | Days to flowering | Family  | Sub-family   | Rhizosphere |             |                     | matK /rbcL GenBank accession: | Germplasm source           |
|------------|------------------|-------------|-------------------|---------|--------------|-------------|-------------|---------------------|-------------------------------|----------------------------|
|            |                  |             |                   |         |              | Enzymes     | Inorganic N | Bacterial community |                               |                            |
| 75-062     | <i>Zea mays</i>  |             | 72                | Poaceae | Panicoideae/ | ■           | ■           | ■                   | X86563.2/ X86563.2            | Courtesy of Margaret Smith |
| B73        | <i>ssp. mays</i> |             | 79                | “       | “            | ■           | ■           | ■                   |                               | Courtesy of Ed Buckler     |
| B97        | “                |             | 79                | “       | “            | ■           | ■           | ■                   |                               | USDA GRIN : PI 564682      |
| H99        | “                |             | 72                | “       | “            | ■           | ■           | ■                   |                               | USDA GRIN : PI 587129      |
| Hp301      | “                |             | 79                | “       | “            | ■           | ■           | ■                   |                               | USDA GRIN : PI 587131      |
| Il14H      | “                |             | 72                | “       | “            | ■           | ■           | ■                   |                               | USDA GRIN : Ames 27118     |
| Ki3        | “                |             | 88                | “       | “            | ■           |             | ■                   |                               | USDA GRIN : Ames 27123     |
| Mo18W      | “                |             | 88                | “       | “            | ■           |             | ■                   |                               | USDA GRIN : PI 550441      |
| Ms71       | “                |             | 72                | “       | “            | ■           | ■           | ■                   |                               | USDA GRIN : PI 587137      |
| Oh7B       | “                |             | 79                | “       | “            | ■           | ■           | ■                   |                               | USDA GRIN : Ames 19323     |
| Tx303      | “                |             | 88                | “       | “            | ■           |             | ■                   | USDA GRIN : Ames 19327        |                            |

**Table S1 cont.** Plant genotypes grown in common garden experiment, sample types collected and GenBank accession numbers for chloroplast sequences of species or congeneric representative used to construct plant phylogeny.

| Species Code | Species                            | Common Name         | Days to Flowering | Family        | Sub-Family                                 | Enzymes | Inorganic N | Bacterial community | Chloroplast matK /rbcL GenBank accession: | Germplasm source                          |
|--------------|------------------------------------|---------------------|-------------------|---------------|--------------------------------------------|---------|-------------|---------------------|-------------------------------------------|-------------------------------------------|
| ERATE        | <i>Eragrostis tef</i>              | Teff (Tiffany)      | 72                | Poaceae       | Chloridoideae/<br>Eragrostideae            | ■       | ■           | ■                   | HE586095.1 / HE577859.1                   | Hancock Seed Co.                          |
| ELCOR        | <i>Eleusine coracana</i>           | Finger millet       | 88                | Poaceae       | Chloridoideae/<br>Cynodonteae              | ■       |             | ■                   | HQ180864.1/ HQ182427.1                    | USDA Grin: PI 427233                      |
| SORBI        | <i>Sorghum bicolor ssp bicolor</i> | Grain sorghum       | 84                | Poaceae       | Panicoideae/<br>Andropogoneae              | ■       |             | ■                   | EF115542.1/ AM849341.1                    | King's Agri-Seed                          |
| SORSUD       | <i>Sorghum x drummondii</i>        | Sudangrass          | 84                | Poaceae       | Panicoideae/<br>Andropogoneae              | ■       |             | ■                   |                                           | Johnny's Selected Seeds                   |
| ECHCG        | <i>Echinochloa crus-galli</i>      | Barnyard Grass      | 53                | Poaceae       | Panicoideae/<br>Paniceae/<br>Boivinellinae | ■       | ■           | ■                   | 966202092/ AM887871.1                     | Aurora, NY                                |
| SETFA        | <i>Setaria faberi</i>              | Giant foxtail       | 61                | Poaceae       | Panicoideae/<br>Paniceae/<br>Cenchrinae    | ■       | ■           | ■                   | KF163774.1/<br>KF163540.1                 | Aurora, NY                                |
| ABUTH        | <i>Abutilon theophrasti</i>        | Velvetleaf          | 57                | Malvaceae     | Malvoideae                                 | ■       | ■           | ■                   | HQ696683.1/<br>HM849734.1                 | Aurora                                    |
| HELAN        | <i>Helianthus annuus</i>           | Sunflower (Mammoth) | 84                | Asteraceae    | Asteroideae                                | ■       |             | ■                   | AY215805.1/ AF097517.1                    | Livingston Seed Co.                       |
| FAGES        | <i>Fagopyrum esculentum</i>        | Buckwheat           | 36                | Polygonaceae  | Polygonoideae                              | ■       | ■           | ■                   | JF829981.1/ D86285.1                      | Lakeview Organic Grain variety not stated |
| AMAPO        | <i>Amaranthus powellii</i>         | Pigweed             | 53                | Amaranthaceae | Amaranthoideae                             | ■       | ■           | ■                   | 169146456/ KJ773261.1                     | Aurora, NY                                |
| GLYMA        | <i>Glycine max</i>                 | Soybean cv Sheyenne | 57                | Fabaceae      | Faboideae                                  | ■       | ■           | ■                   | AF142700.1/ Z95552.1                      | Lakeview Organic Grain                    |

**Table S2** Inorganic N concentration in bare soil and rhizosphere samples at harvest.

| Plant                  | DAP | Inorganic N (mg kg soil <sup>-1</sup> )* |                           |
|------------------------|-----|------------------------------------------|---------------------------|
|                        |     | 0 kg N ha <sup>-1</sup>                  | 95 kg N ha <sup>-1</sup>  |
| Bare soil              | 36  | 9.62 (0.91)                              | 14.48 (1.75)              |
| Bare soil              | 53  | 9.82 (0.48)                              | 30.01 (2.37)              |
| Bare soil              | 57  | 10.92 (0.87)                             | 27.44 (4.69)              |
| Bare soil              | 61  | 12.92 (0.67)                             | 22.29 (1.39)              |
| Bare soil              | 72  | 11.47 (1.55)                             | 19.38 (1.29)              |
| Bare soil              | 79  | 10.79 (0.63)                             | 19.23 (1.18)              |
| Bare soil              | 84  | --                                       | --                        |
| Bare soil              | 88  | --                                       | --                        |
| <i>F. esculentum</i>   | 36  | 11.12 (1.11)                             | 20.41 (5.36)              |
| <i>A. powellii</i>     | 53  | 5.43 (0.41)                              | 12.13 (2.05)              |
| <i>E. crus-galli</i>   | 53  | 10.4 (4.02)                              | 12.73 (6.32) <sup>a</sup> |
| <i>A. theophrasti</i>  | 57  | 13.55 (3.19)                             | 26.13 (2.08)              |
| <i>G. max</i>          | 57  | 11.26 (1.56)                             | 19.42 (2.16)              |
| <i>S. faberi</i>       | 61  | 6.24 (0.38)                              | 6.67 (0.44)               |
| 75-062                 | 72  | 5.88 (0.91)                              | 8.1 (1.86)                |
| <i>E. tef</i>          | 72  | 6.02 (1.05)                              | 7.36 (2.1)                |
| H99                    | 72  | --                                       | --                        |
| II14H                  | 72  | --                                       | --                        |
| MS71                   | 72  | 8.99 (2.15)                              | 15.7 (3.52)               |
| B73                    | 79  | --                                       | --                        |
| B97                    | 79  | 5.55 (0.39)                              | 6.25 (0.55)               |
| Hp301                  | 79  | --                                       | --                        |
| Oh7B                   | 79  | 6.31 (0.61)                              | 7.48 (0.51)               |
| <i>H. annuus</i>       | 84  | --                                       | --                        |
| <i>S. bicolor</i>      | 84  | --                                       | --                        |
| <i>S. x drummondii</i> | 84  | --                                       | --                        |
| <i>E. coracana</i>     | 88  | --                                       | --                        |
| Ki3                    | 88  | --                                       | --                        |
| Mo18                   | 88  | --                                       | --                        |
| Tx303                  | 88  | --                                       | --                        |

\* Values are mean ( $\pm$  s.e.m.)

-- Indicates inorganic N samples not collected

<sup>a</sup> One outlier (55.33 mg kg soil<sup>-1</sup>) removed in table and all inorganic N analyses

**Table S3** Analysis of variance testing main effects of plant genotype, nitrogen (N) treatment (0, 95 kg N ha<sup>-1</sup>) and interaction on plant growth metrics\*

|                      | Interspecific Comparisons |        |       |                 | Intraspecific comparisons |        |       |                 |
|----------------------|---------------------------|--------|-------|-----------------|---------------------------|--------|-------|-----------------|
|                      | SS                        | DF     | F     | <i>p</i>        | SS                        | DF     | F     | <i>p</i>        |
| <b>Biomass</b>       |                           |        |       |                 |                           |        |       |                 |
| Genotype             | 6.56                      | 11, 33 | 11.24 | <b>&lt;0.01</b> | 1.30                      | 10, 30 | 3.99  | <b>&lt;0.01</b> |
| N treatment          | 0.55                      | 1, 36  | 10.42 | <b>&lt;0.01</b> | 0.17                      | 1, 33  | 5.30  | <b>0.03</b>     |
| Genotype x Treatment | 0.89                      | 11, 36 | 1.52  | 0.17            | 0.27                      | 10, 33 | 0.85  | 0.58            |
| <b>N uptake</b>      |                           |        |       |                 |                           |        |       |                 |
| Genotype             | 4.00                      | 11, 33 | 5.29  | <b>&lt;0.01</b> | 0.88                      | 10, 30 | 1.38  | 0.24            |
| N treatment          | 2.39                      | 1, 36  | 33.99 | <b>&lt;0.01</b> | 1.54                      | 1, 33  | 24.22 | <b>&lt;0.01</b> |
| Genotype x Treatment | 1.19                      | 11, 36 | 1.57  | 0.15            | 0.42                      | 10, 33 | 0.65  | 0.76            |
| <b>NUE</b>           |                           |        |       |                 |                           |        |       |                 |
| Genotype             | 2.63                      | 11, 33 | 33    | <b>&lt;0.01</b> | 1.40                      | 10, 30 | 10.67 | <b>&lt;0.01</b> |
| N treatment          | 0.64                      | 1, 36  | 36    | <b>&lt;0.01</b> | 0.66                      | 1, 33  | 50.32 | <b>&lt;0.01</b> |
| Genotype x Treatment | 0.36                      | 11, 36 | 36    | <b>0.03</b>     | 0.24                      | 10, 33 | 1.83  | 0.09            |

\*Growth metrics of plant biomass, nitrogen uptake and nitrogen use efficiency (NUE: g C g N<sup>-1</sup>) are corrected for harvest date by using residuals from best fit-model of plant growth by days after planting (see figure S2). *P*-values < 0.05 are highlighted in bold.

**Table S4** Analysis of variance testing main effects of sample type (rhizosphere vs bare soil), nitrogen (N) treatment (0, 95 kg N ha<sup>-1</sup>) and interactions on potential activity of extracellular beta-xylosidase (BX), cellobiohydrolase (CB), leucine aminopeptidase (LAP) and N-acetyl-glucosaminidase (NAG).

|                 | SS     | DF     | F     | <i>p</i>        |
|-----------------|--------|--------|-------|-----------------|
| <b>BX</b>       |        |        |       |                 |
| Sample type     | 224.5  | 1, 49  | 15.06 | <b>&lt;0.01</b> |
| N treatment     | 55.8   | 1, 146 | 3.74  | <b>0.05</b>     |
| S x N           | 96.3   | 1, 146 | 6.46  | <b>0.01</b>     |
| <b>CB</b>       |        |        |       |                 |
| Sample type     | 279.9  | 1, 43  | 20.00 | <b>&lt;0.01</b> |
| N treatment     | 73.7   | 1, 147 | 5.26  | <b>0.02</b>     |
| S x N           | 145.9  | 1, 147 | 10.43 | <b>&lt;0.01</b> |
| <b>LAP</b>      |        |        |       |                 |
| Sample type     | 1958.8 | 1, 47  | 4.65  | <b>0.04</b>     |
| N treatment     | 3248   | 1, 147 | 7.70  | <b>&lt;0.01</b> |
| S x N           | 9.3    | 1, 147 | 0.02  | 0.88            |
| <b>NAG</b>      |        |        |       |                 |
| Sample type     | 59.6   | 1, 448 | 9.25  | <b>&lt;0.01</b> |
| N fertilization | 8.3    | 1, 147 | 1.28  | 0.26            |
| S x N           | 41.9   | 1, 147 | 6.50  | <b>0.01</b>     |

*P*-values < 0.05 are highlighted in bold.

**Table S5** Analysis of covariance testing correlation between inorganic nitrogen (N) concentration in the rhizosphere and potential activity of extracellular beta-xylosidase (BX), cellobiohydrolase (CB), leucine aminopeptidase (LAP) and N-acetyl-glucosaminidase (NAG).

|     |                          | SS   | DF    | F     | <i>p</i>        | R <sup>2</sup> <sub>m</sub> |
|-----|--------------------------|------|-------|-------|-----------------|-----------------------------|
| BX  | Inorganic N <sup>a</sup> | 211  | 1, 77 | 10.45 | <b>&lt;0.01</b> | .10                         |
| CB  | Inorganic N              | 225  | 1, 79 | 9.92  | <b>&lt;0.01</b> | .12                         |
| LAP | Inorganic N              | 6155 | 1, 69 | 19.70 | <b>&lt;0.01</b> | .11                         |
| NAG | Inorganic N              | 81   | 1, 77 | 12.96 | <b>&lt;0.01</b> | .14                         |

\* Marginal R<sup>2</sup> from a model testing inorganic N concentration as a fixed effect and plant genotype, rep and main plot as random effects. *P*-values < 0.05 are highlighted in bold.

<sup>a</sup>only samples for which inorganic N measured (Table S1) are included in analysis.

**Table S6:** Analysis of variance testing fixed effects of plant genotype and nitrogen (N) fertilization (0, 95 kg N ha<sup>-1</sup>) on potential activity of extracellular beta-xylosidase (BX), cellobiohydrolase (CB), leucine aminopeptidase (LAP) and N-acetyl-glucosiminidase (NAG) in rhizosphere samples.

|     |                          | SS    | DF     | F     | <i>p</i>        |
|-----|--------------------------|-------|--------|-------|-----------------|
| BX  | Genotype                 | 1.00  | 10, 30 | 3.75  | <b>&lt;0.01</b> |
|     | N treatment <sup>a</sup> | 0.34  | 1, 32  | 12.68 | <b>&lt;0.01</b> |
|     | P x N                    | 0.33  | 10, 31 | 1.24  | 0.31            |
| CB  | Genotype                 | 824   | 10, 29 | 4.04  | <b>&lt;0.01</b> |
|     | N treatment              | 288   | 1, 32  | 14.12 | <b>&lt;0.01</b> |
|     | P x N                    | 190   | 10, 32 | 0.93  | 0.52            |
| LAP | Genotype                 | 20710 | 10, 30 | 6.02  | <b>&lt;0.01</b> |
|     | N treatment              | 4327  | 1, 32  | 12.58 | <b>&lt;0.01</b> |
|     | P x N                    | 5481  | 10, 31 | 1.59  | 0.15            |
| NAG | Genotype                 | 0.98  | 10, 30 | 3.81  | <b>&lt;0.01</b> |
|     | N treatment              | 0.99  | 1, 32  | 38.42 | <b>&lt;0.01</b> |
|     | P x N                    | 0.20  | 10, 32 | 0.78  | 0.64            |

<sup>a</sup>Only samples for which inorganic N measured (Table S1) are included in analysis. *P*-values < 0.05 highlighted in bold.

**Table S7:** Phylum statistics of rhizosphere bacterial community composition at OTU level and aggregated by phylum.

| Phylum                  | # OTU responders * | OTU Relative Abundance |          |          | Phylum Relative Abundance |          |          |
|-------------------------|--------------------|------------------------|----------|----------|---------------------------|----------|----------|
|                         |                    | Min                    | Median   | Max      | Min                       | Median   | Max      |
| Proteobacteria          | 507                | 0                      | 7.92E-06 | 1.55E-03 | 1.40E-01                  | 2.36E-01 | 4.13E-01 |
| Bacteroidetes           | 206                | 0                      | 0.00E+00 | 8.05E-04 | 1.62E-02                  | 4.07E-02 | 7.40E-02 |
| Actinobacteria          | 174                | 0                      | 5.53E-05 | 2.95E-03 | 1.00E-01                  | 1.60E-01 | 3.19E-01 |
| Chloroflexi             | 158                | 0                      | 1.83E-05 | 7.83E-04 | 1.75E-02                  | 4.47E-02 | 9.11E-02 |
| Planctomycetes          | 144                | 0                      | 0.00E+00 | 2.92E-04 | 5.08E-03                  | 1.17E-02 | 3.62E-02 |
| Verrucomicrobia         | 93                 | 0                      | 8.95E-06 | 9.69E-04 | 1.07E-02                  | 3.03E-02 | 4.25E-02 |
| Firmicutes              | 58                 | 0                      | 0.00E+00 | 2.79E-03 | 2.37E-03                  | 1.30E-02 | 9.87E-02 |
| Acidobacteria           | 56                 | 0                      | 3.89E-05 | 9.63E-04 | 9.35E-03                  | 1.95E-02 | 5.13E-02 |
| Gemmatimonadetes        | 38                 | 0                      | 1.17E-05 | 4.00E-04 | 1.53E-03                  | 4.81E-03 | 1.17E-02 |
| Cyanobacteria           | 24                 | 0                      | 0.00E+00 | 6.77E-04 | 7.58E-04                  | 2.48E-03 | 1.25E-02 |
| Armatimonadetes         | 21                 | 0                      | 0.00E+00 | 2.72E-04 | 1.27E-03                  | 2.10E-03 | 3.68E-03 |
| Fibrobacteres           | 8                  | 0                      | 0.00E+00 | 4.76E-04 | 2.21E-05                  | 5.45E-04 | 3.52E-03 |
| Spirochaetes            | 5                  | 0                      | 0.00E+00 | 1.11E-03 | 1.89E-04                  | 5.24E-04 | 5.52E-03 |
| Candidate_division_BRC1 | 3                  | 0                      | 0.00E+00 | 2.98E-04 | 2.32E-05                  | 8.57E-05 | 8.63E-04 |
| Elusimicrobia           | 3                  | 0                      | 0.00E+00 | 2.02E-04 | 1.26E-05                  | 1.38E-04 | 4.71E-04 |
| Chlorobi                | 2                  | 0                      | 5.79E-06 | 2.23E-04 | 2.53E-05                  | 1.04E-04 | 3.17E-04 |
| Nitrospirae             | 2                  | 0                      | 0.00E+00 | 4.63E-04 | 0.00E+00                  | 1.27E-04 | 9.27E-04 |
| TM6                     | 2                  | 0                      | 0.00E+00 | 8.77E-05 | 0.00E+00                  | 3.17E-05 | 1.73E-04 |
| Candidate_division_OD1  | 1                  | 0                      | 0.00E+00 | 1.23E-04 | 0.00E+00                  | 3.79E-05 | 1.23E-04 |
| Deinococcus-Thermus     | 1                  | 0                      | 0.00E+00 | 3.59E-04 | 0.00E+00                  | 4.31E-05 | 3.59E-04 |

\* Rhizosphere responders are identified in DESeq2 in comparison of samples from each genotype with bare soil control ( $\log_2$ -fold change > 0.5, BH adjusted  $p < 0.05$ ). Metrics represent minimum, median and max relative abundance in in samples aggregated by genotype.



**Table S8:** Permutational multiple analysis of variance testing main effects of plant genotype and species identity and nitrogen (N) treatment (0, 95 kg N ha<sup>-1</sup>) on rhizosphere bacterial community beta-diversity (weighted-UniFrac) on each sampling date.

| Factor    | SS   | DF | F    | R <sup>2</sup> | p <sup>*</sup>  | Factor    | SS   | DF | F    | R <sup>2</sup> | p <sup>*</sup>  |
|-----------|------|----|------|----------------|-----------------|-----------|------|----|------|----------------|-----------------|
| 53 DAP    |      |    |      |                |                 | 79 DAP    |      |    |      |                |                 |
| Genotype  | 0.05 | 1  | 1.92 | 0.13           | 0.09            | Genotype  | 0.11 | 3  | 1.77 | 0.15           | <b>&lt;0.01</b> |
| Treatment | 0.03 | 1  | 1.06 | 0.08           | 0.36            | Treatment | 0.04 | 1  | 0.06 | 0.06           | <b>0.02</b>     |
| Residuals | 0.26 | 13 |      | 0.79           |                 | Residuals | 0.54 | 27 |      | 0.78           |                 |
| 57 DAP    |      |    |      |                |                 | 84 DAP    |      |    |      |                |                 |
| Genotype  | 0.12 | 1  | 3.46 | 0.20           | <b>&lt;0.01</b> | Genotype  | 0.14 | 2  | 4.36 | 0.28           | <b>&lt;0.01</b> |
| Treatment | 0.03 | 1  | 0.94 | 0.05           | 0.43            | Treatment | 0.03 | 1  | 2.01 | 0.07           | 0.07            |
| Residuals | 0.46 | 13 |      | 0.75           |                 | Residuals | 0.33 | 20 |      | 0.65           |                 |
| 72 DAP    |      |    |      |                |                 | 88 DAP    |      |    |      |                |                 |
| Genotype  | 0.44 | 4  | 6.58 | 0.43           | <b>&lt;0.01</b> | Genotype  | 0.29 | 3  | 6.53 | 0.41           | <b>&lt;0.01</b> |
| Treatment | 0.02 | 1  | 0.92 | 0.02           | 0.38            | Treatment | 0.02 | 1  | 1.56 | 0.03           | 0.14            |
| Residuals | 0.57 | 34 |      | 0.55           |                 | Residuals | 0.40 | 27 |      | 0.56           |                 |

\* *p*-values based on 999 permutations; *p*-values < 0.05 highlighted in bold. For reference, genotypes harvested on each date include 53: *E. crus-gali* and *A. powellii*; 57: *A. theophrast* and *G. max*; 72: *E. tef*, 75-062, H99, Ms71, and II14H; 79: B73, B97, Hp301 and Oh7B; 84: *S. biocolor*, *S. x drummondii* and *H. annuus*; 88: Ki3, Mo18W, Tx303. Data from day 36 and 61 not shown as only one genotype was sampled on each date.

**Table S9** Permutation tests for marginal effects (Type III) of terms in constrained analysis of principal coordinates relating plant growth characteristics to rhizosphere bacterial community composition.

| Factor                 | DF   | SS   | F    | <i>p</i> *      |
|------------------------|------|------|------|-----------------|
| Days after planting    | 1,41 | 0.13 | 4.71 | <b>&lt;0.01</b> |
| Seed size <sup>a</sup> | 1,41 | 0.07 | 2.52 | <b>0.02</b>     |
| NUE <sup>b</sup>       | 1,41 | 0.11 | 3.73 | <b>&lt;0.01</b> |
| N uptake <sup>c</sup>  | 1,41 | 0.10 | 3.35 | <b>&lt;0.01</b> |

\* *P*-values based on 999 permutations

<sup>a</sup> Log-transformed

<sup>b,c</sup> Plant nitrogen use efficiency (NUE: g C g N<sup>-1</sup>) and total nitrogen (N) uptake corrected for days after planting using residuals from fit line in Figure S1.
